# Supplementary material
Source: PubMed Central journal article supplement (PMC3307274)

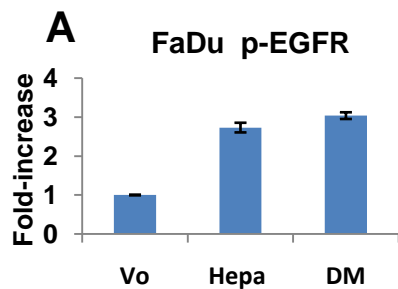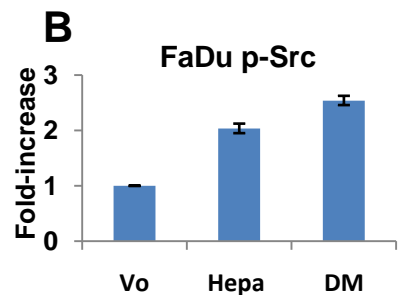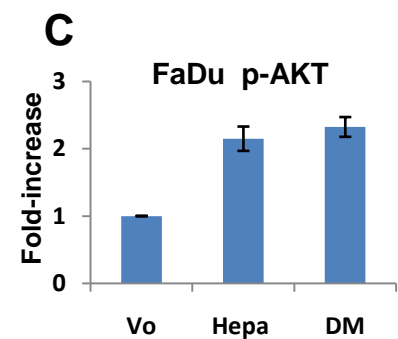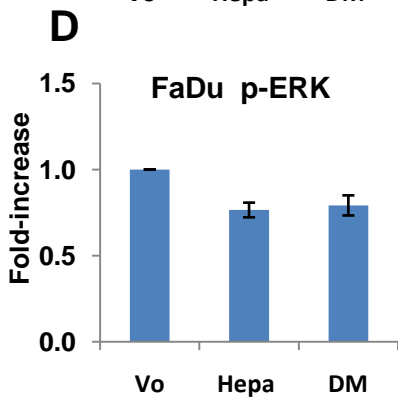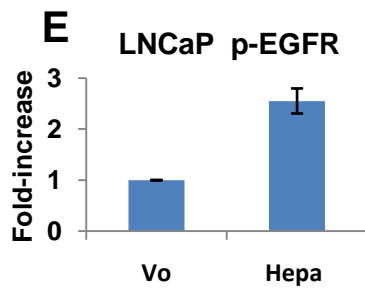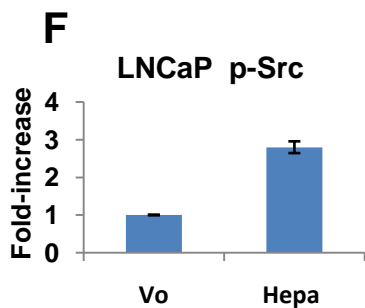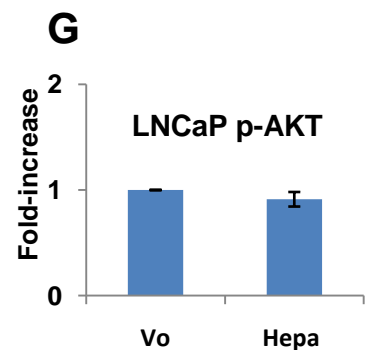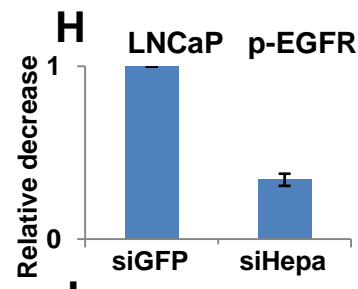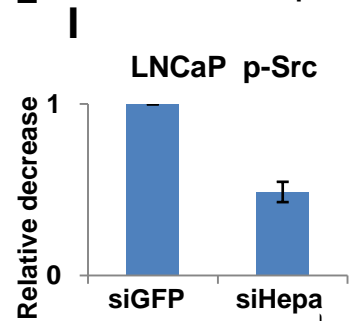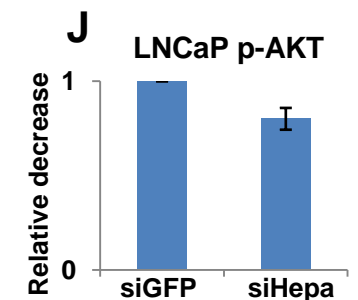

Supplement: supp_M111.271346_jbc.M111.271346-2.pdf [file supp_M111.271346_jbc.M111.271346-2.pdf]

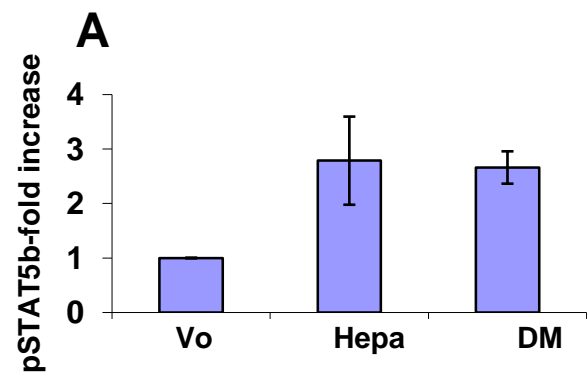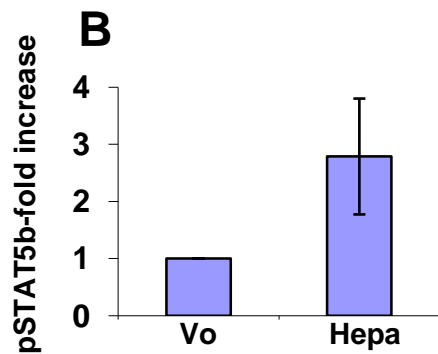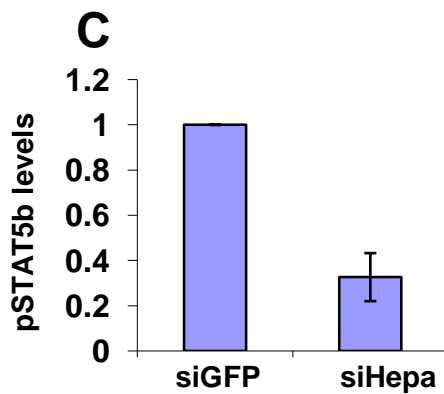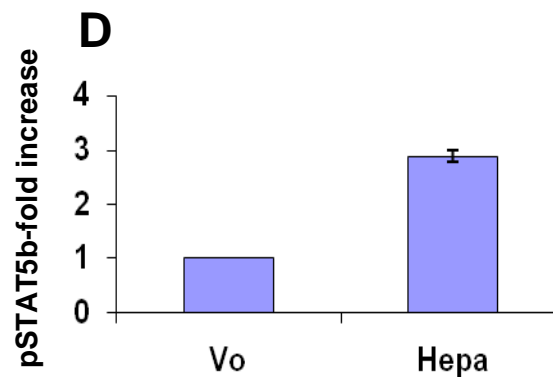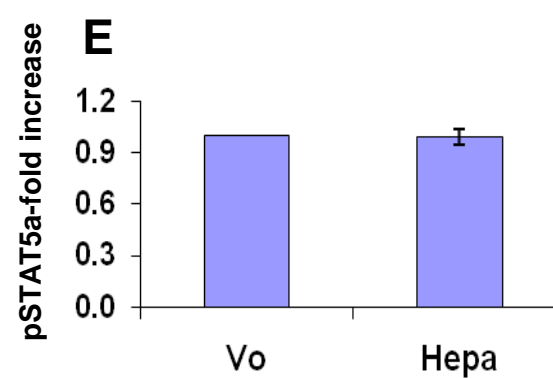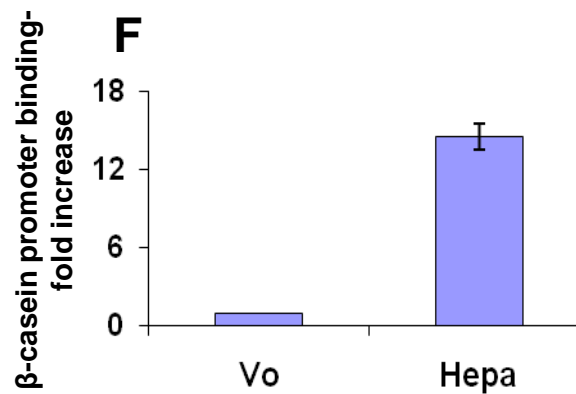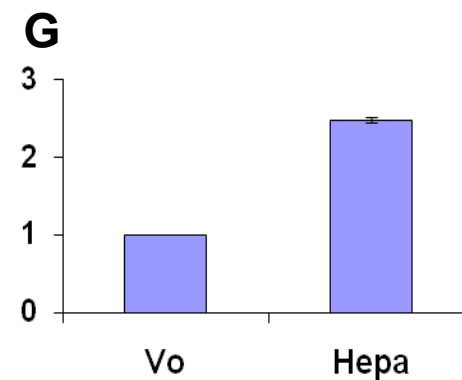

Supplement: supp_M111.271346_jbc.M111.271346-3.pdf [file supp_M111.271346_jbc.M111.271346-3.pdf]

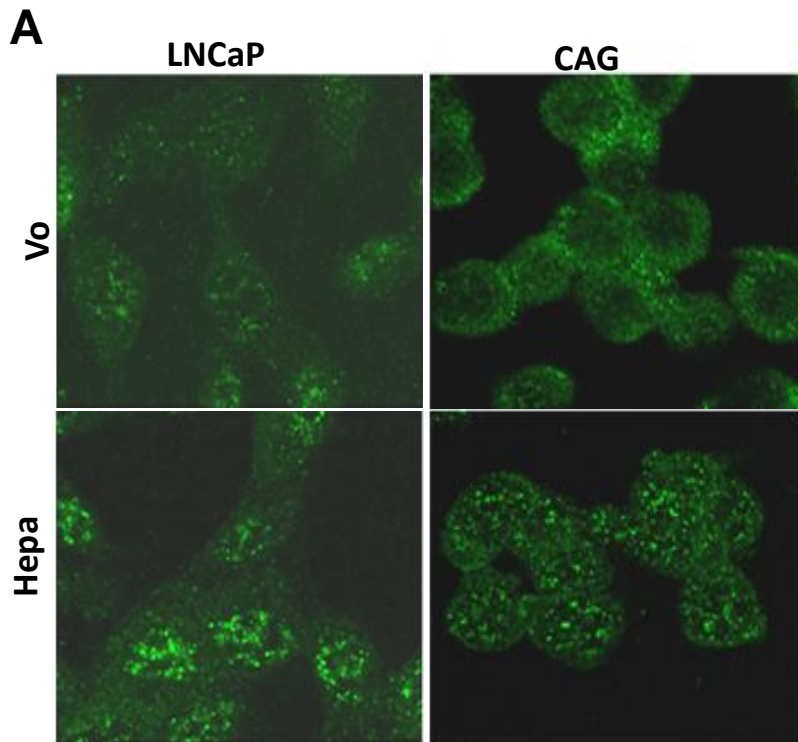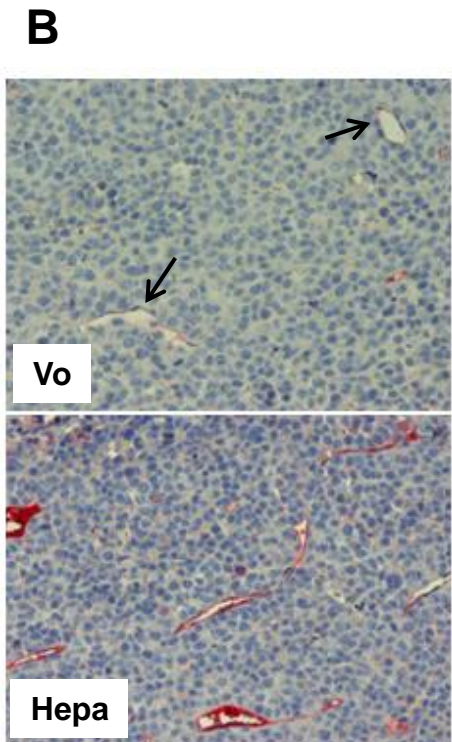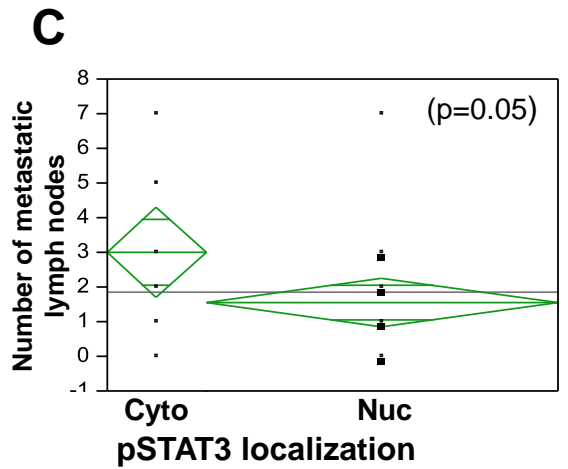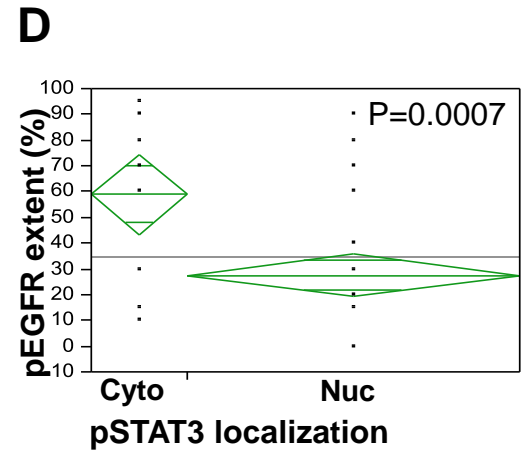

Supplement: supp_M111.271346_jbc.M111.271346-4.pdf [file supp_M111.271346_jbc.M111.271346-4.pdf]

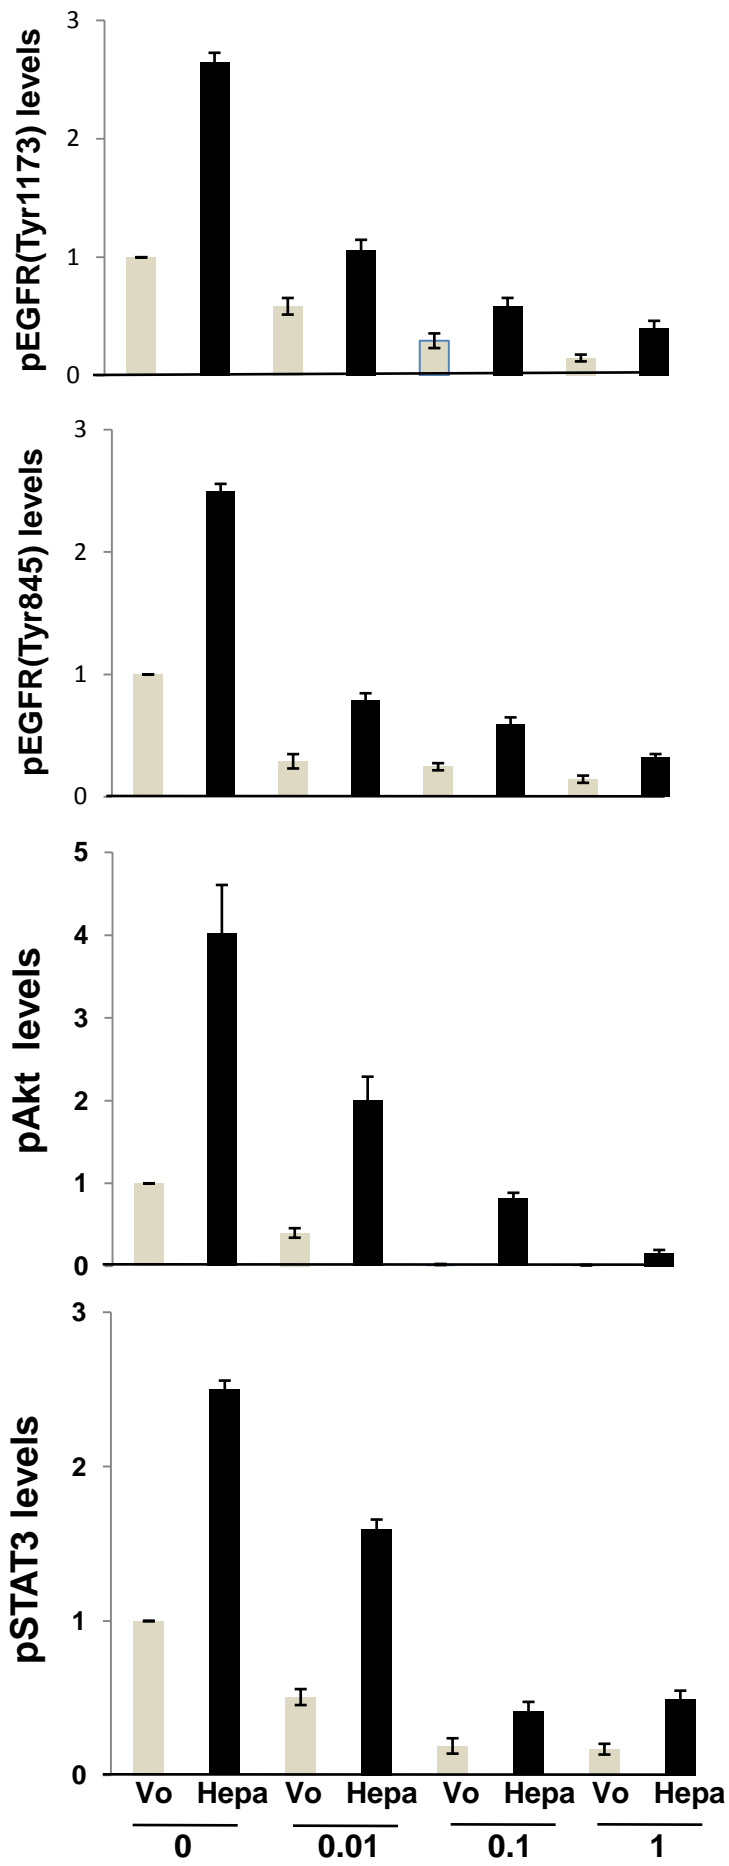

Supplement: supp_M111.271346_jbc.M111.271346-5.pdf [file supp_M111.271346_jbc.M111.271346-5.pdf]
